# Supplementary material
Source: PubMed Central journal article supplement (PMC2633825)
Supplement: pp.108.131862_1.pdf [file pp.108.131862_1.pdf]

**Supplemental Table S1:** Thioacidolysis yields and relative frequency of the guaiacyl G and syringyl S lignin-derived monomers released by the grapevine hairy roots overexpressing *VvMYBPA1* (lines PA1-2A and PA1-7A) or *VvMYBPA2* (lines PA2-1A and PA2-7A) versus wild type line (control-1 and control-2). Thioacidolysis experiments were run in single assay and from independent control or transformed lines. The H monomers were recovered as trace components.

| Line      | Total yield (G+S)        |      |      |
|-----------|--------------------------|------|------|
|           | ( $\mu\text{mol/g DW}$ ) | %G   | %S   |
| Control-1 | 7.32                     | 67.7 | 32.3 |
| Control-2 | 8.68                     | 68.5 | 31.5 |
| PA1-2A    | 5.81                     | 70.3 | 29.7 |
| PA1-7A    | 13.26                    | 81.3 | 18.7 |
| PA2-1A    | 12.22                    | 77.7 | 22.3 |
| PA2-7A    | 7.40                     | 79.0 | 21.0 |
