# Supplementary material
Source: PubMed Central journal article supplement (PMC2633825)
Supplement: pp.108.131862_2.pdf [file pp.108.131862_2.pdf]

**Supplemental Table S2:** Primers used for real-time PCR and expected size for amplified fragments. The accession number from public database is given, and if not available, the transcript number from the *Vitis* gene model (<http://www.genoscope.cns.fr/externe/GenomeBrowser/Vitis/>, Jaillon et al., 2007).

| Gene name            | Accession number or genome reference | Sequences of forward (F) and reverse (R) primers      | Expected size (bp) |
|----------------------|--------------------------------------|-------------------------------------------------------|--------------------|
| VvMybPA1             | CAJ90831                             | F- TTGACGGGGTTGACTTCTTC<br>R- GAGTAGTGATTCCGGCGAAGG   | 188                |
| VvMybPA2             | EU919682                             | F- GACATTGGCGACCTCCTTAC<br>R- CGAGAAAATCGGAACAAGGA    | 121                |
| LAR1                 | AJ865336                             | F- CACATGCATGCGATTAGTCC<br>R- ACGAATTCGCCCATGTTAC     | 102                |
| LAR2                 | AJ865334                             | F- CTACGGTGATGGCTCTGTCA<br>R- GCAGCGGCTAGTAGGTCATC    | 222                |
| ANR                  | CAD91911                             | F-GCTTGTGAAAGAGGGGTTCA<br>R-TGCTCCTTTTAGCCAAGACA      | 132                |
| DFR                  | X75964                               | F-GAAACCTGTAGATGGCAGGA<br>R-GGCCAAATCAAACCTACCAGA     | 114                |
| LDOX                 | X75966                               | F-ACCTTCATCCTCCACAACAT<br>R-AGTAGAGCCTCCTGGGTCTT      | 340                |
| Glucosyl transferase | GSVIVT00013771001                    | F-TTGAAGGGACACGTGTGAAG<br>R-GAAACAAACAGGTTGCGTGA      | 172                |
| Glucosyl transferase | GSVIVT00036670001                    | F-TGAGTATGGTGCTGGTTTGC<br>R-ACGCTACATCGTGACTCCTG      | 121                |
| Glucosyl transferase | GSVIVT00036656001                    | F-ATTTTGATGTAGCGTGAAATAAG<br>R-TGGGTGACAAAACCTAGGGAAA | 136                |
